# Supplementary material for: A novel ZnO/viologen photochromic composite film with a rapid UV response for rewritable paper, solar UV detection, smart windows and anti-counterfeiting
Source: Royal Society of Chemistry journal article supplement (doi:10.1039/d3tc01624b), 2023-01-01
Supplement: d3tc01624b1.pdf [file d3tc01624b1.pdf]

## Supporting Information

### **A Novel ZnO/Viologens Photochromic Composite Film with Rapid UV Response for Rewritable Paper, Solar UV Detection, Smart Windows and Anti-Counterfeiting**

*Na Chen<sup>a</sup>, Wan-Xiong Yong<sup>a</sup>, Tuo-Dong Xiong<sup>a</sup> and Guo-Dong Fu<sup>a\*</sup>*

<sup>a</sup> School of Chemistry and Chemical Engineering, Southeast University, Jiangning District, Nanjing, Jiangsu Province 211189, PR China. Email: 101010855@seu.edu.cn and fu7352@seu.edu.cn.

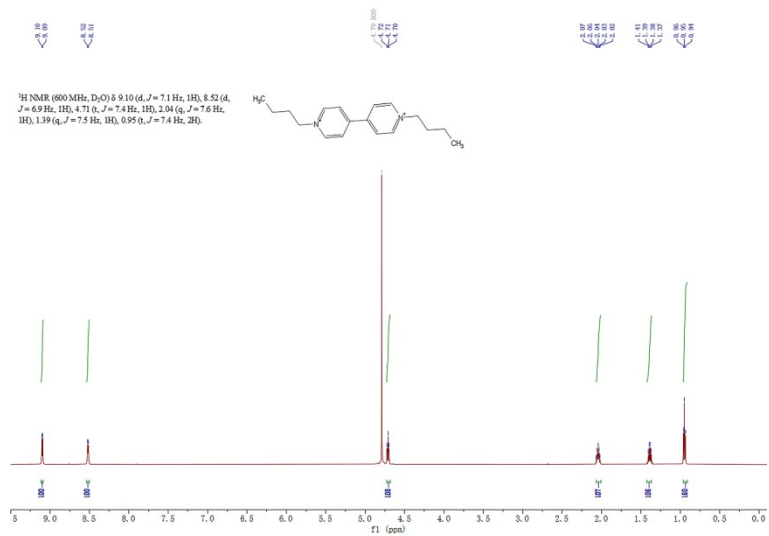

Fig. S1  $V_1$  NMR spectrum.

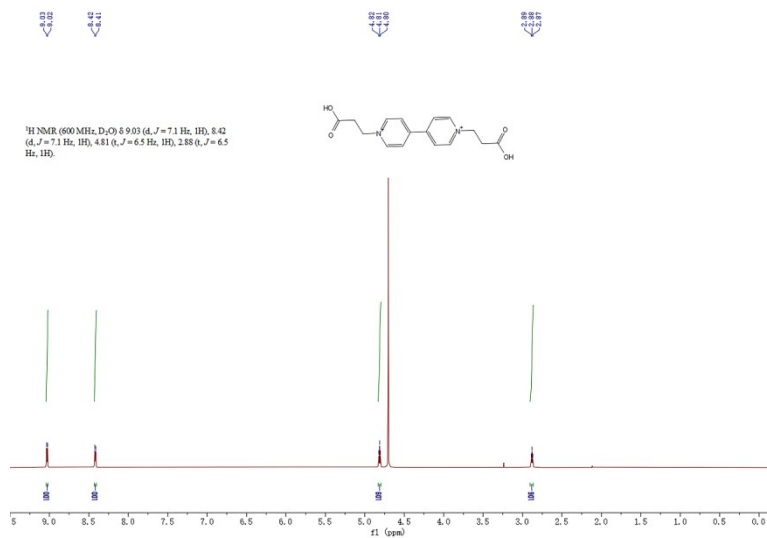

Fig. S2  $V_2$  NMR spectrum.

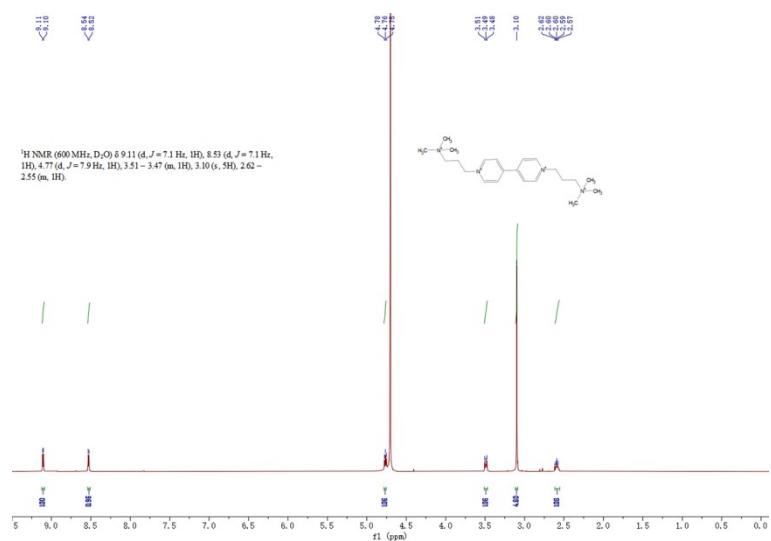

**Fig. S3**  $V_3$  NMR spectrum.

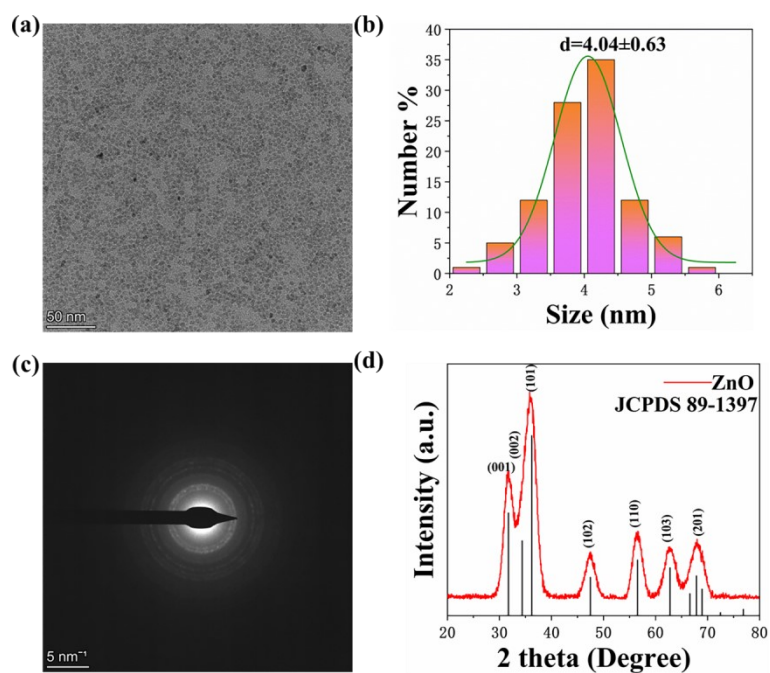

**Fig. S4** Crystal structures of ZnO NPs (a) TEM images; (b) nanoparticle size distribution; (c) electron diffraction patterns; (d) XRD patterns.

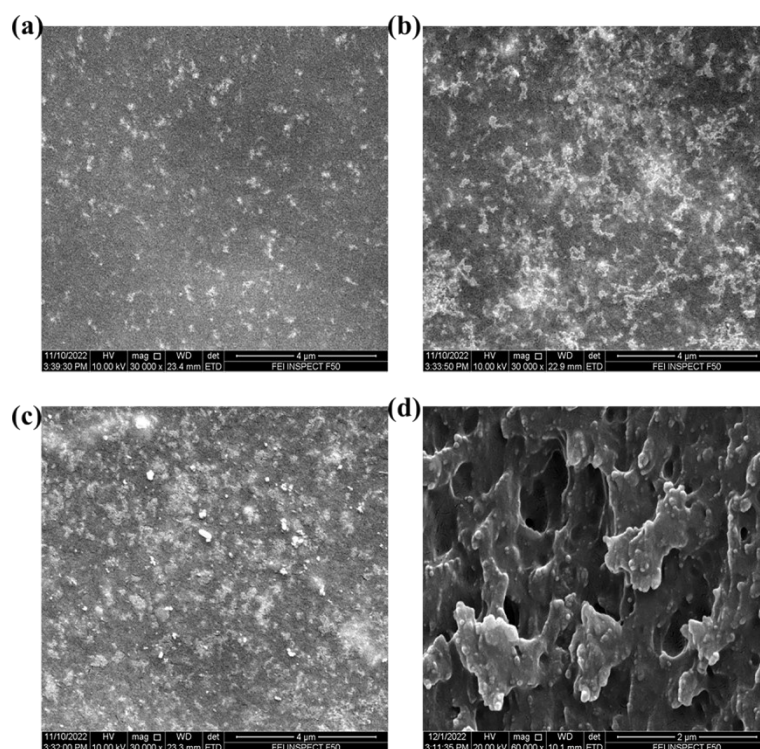

**Fig. S5** SEM images of the surface of (a) HCP/V<sub>2</sub><sup>2+</sup>/5.5 wt% ZnO, (b) HCP/V<sub>2</sub><sup>2+</sup>/8.5 wt% ZnO and (c) HCP/V<sub>2</sub><sup>2+</sup>/10 wt% ZnO films. (d) Cross-sectional SEM image of HCP/V<sub>2</sub><sup>2+</sup>/5.5 wt% ZnO film.

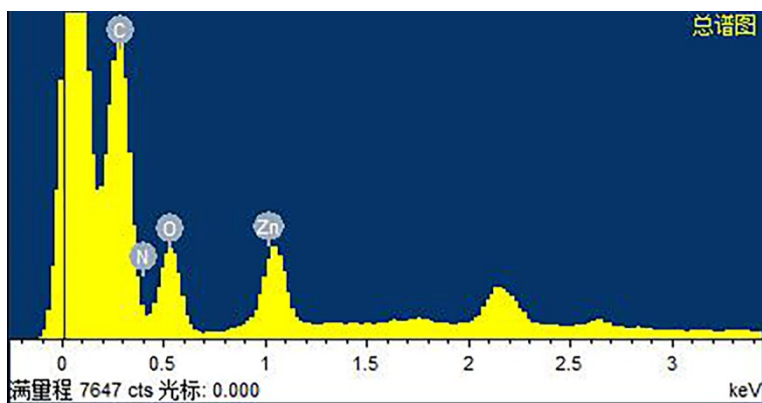

**Fig. S6** The EDS spectrum of HCP/V<sub>2</sub><sup>2+</sup>/5.5 wt% ZnO film.

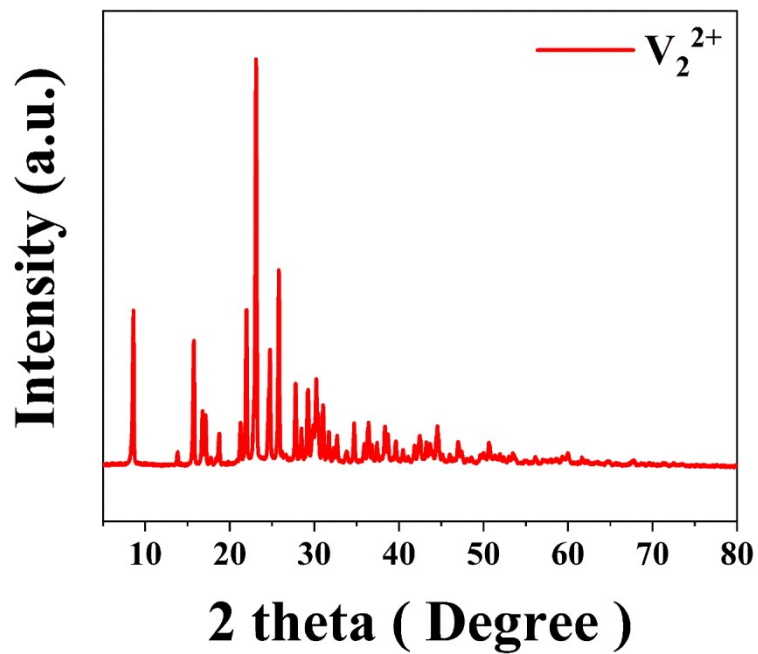

Fig. S7  $V_2^{2+}$  XRD spectrum.

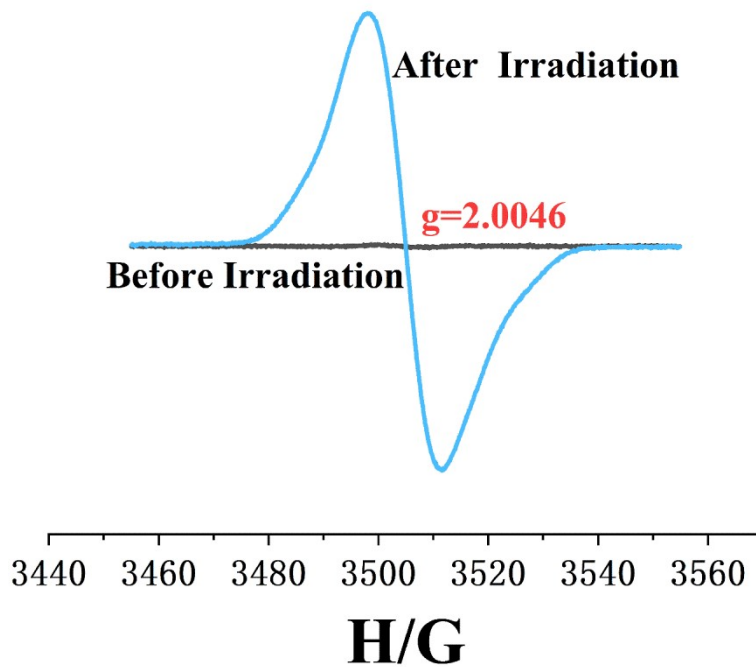

Fig. S8 The EPR spectra of the composite film before irradiation and after irradiation at room temperature.

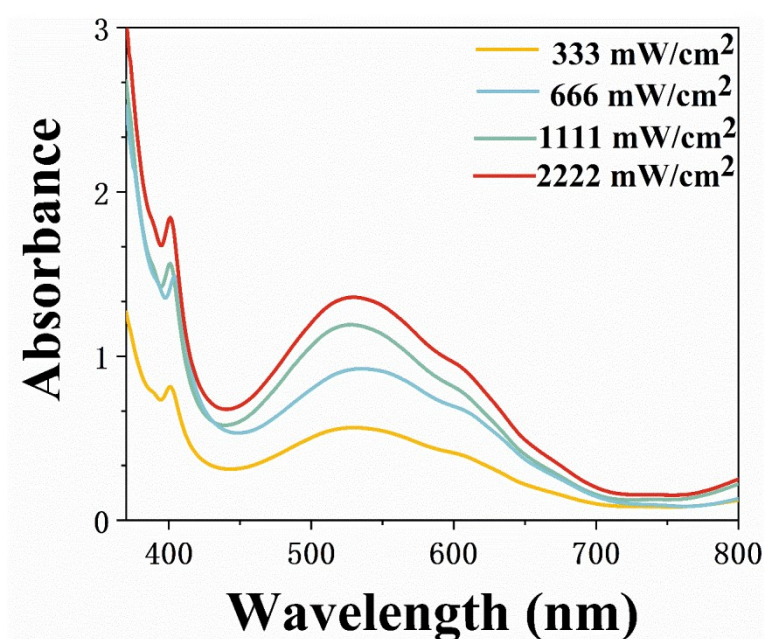

**Fig. S9** The effects of different UV intensities on the photochromic performance of the HCP/V<sub>2</sub>O<sub>5</sub>/5.5 wt% ZnO film. ( By placing the film at the same distance from the UV lamp (3 W, 6 W, 10 W, 20 W), the UV intensity can be determined using the formula: UV intensity (mW/cm<sup>2</sup>) = Lamp output (mW) / (distance from lamp)<sup>2</sup>.

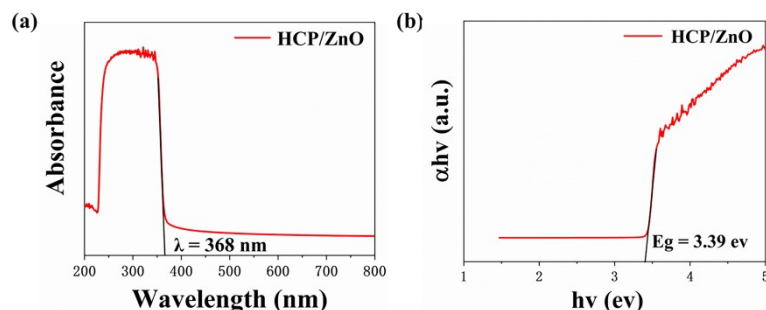

**Fig. S10** Energy level evaluation of ZnO NPs.

The determination of the conduction band (CB) and valence band (VB) edge positions of zinc oxide (ZnO) depends on various factors, such as the bulk bandgap ( $E_{g, \text{bulk}}$ ), size-dependent quantum confinement effect, and electron-hole pair Coulomb interaction. To estimate the position of the CB and VB, the following equations are used:<sup>1,2</sup>

$$E_e = E_{\text{CB}} + \frac{m_h}{m_e + m_h} \left[ E_{g, \text{QD}} - E_{g, \text{bulk}} + \frac{1.8e^2}{4\pi\epsilon R} \right] \quad \text{Eq.S1(a)}$$

$$E_h = E_{\text{VB}} + \frac{m_e}{m_e + m_h} \left[ E_{g, \text{QD}} - E_{g, \text{bulk}} + \frac{1.8e^2}{4\pi\epsilon R} \right] \quad \text{Eq.S1(b)}$$

The CB and VB edge positions of bulk ZnO are -4.19 eV and -7.39 eV, respectively, while the effective masses of electrons and holes are  $0.26 m_0$  and  $0.59 m_0$ , respectively. Here,  $m_0$  represents the free electron mass<sup>3</sup>. The bandgap of a QD is 3.39 eV, as shown in Figure S10, while the bandgap of the bulk is 3.2 eV. The dielectric constant of bulk ZnO is  $3.7\epsilon_0$ , where  $\epsilon_0$  is the dielectric constant of free space. As depicted in Fig. S4b, the QD radius ( $R$ ) is 2 nm.  $E_e$  and  $E_h$  are calculated as -4.02 eV and -7.21 eV, respectively. For molecules, the reduction potentials are as follows: -0.590 V (vs. Ag/AgCl), -0.542 V, and -0.473 V for  $V_1^{2+}$ ,  $V_2^{2+}$ , and  $V_3^{2+}$ , respectively. Then the reduction potentials with respect to VAC can be obtained as:

$$E_{\text{VAC}} = -4.5 - eE_{\text{NHE}} \quad \text{Eq.S2}$$

Therefore, the energy levels of the viologens (vs. VAC) are -4.10 eV, -4.16 eV, -4.23 eV for  $V_1^{2+}$ ,  $V_2^{2+}$  and  $V_3^{2+}$  respectively. The driving force (CS) for electron transfer from ZnO to viologens is calculated by the energy difference between conduction band edge position and viologen reduction potentials.

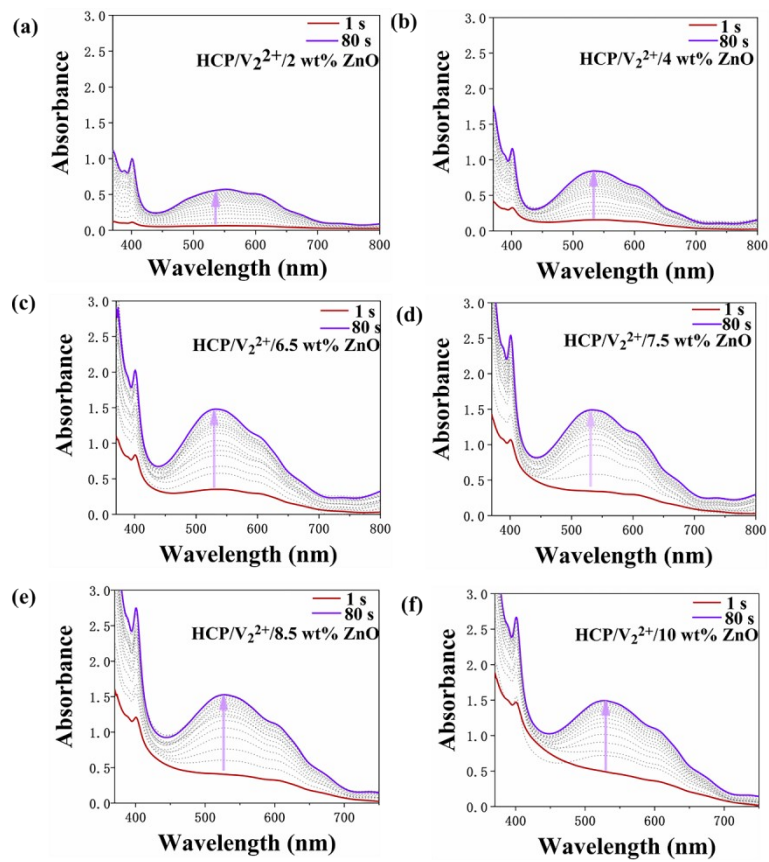

Fig. S11 UV-vis spectra of the films with different ZnO content.



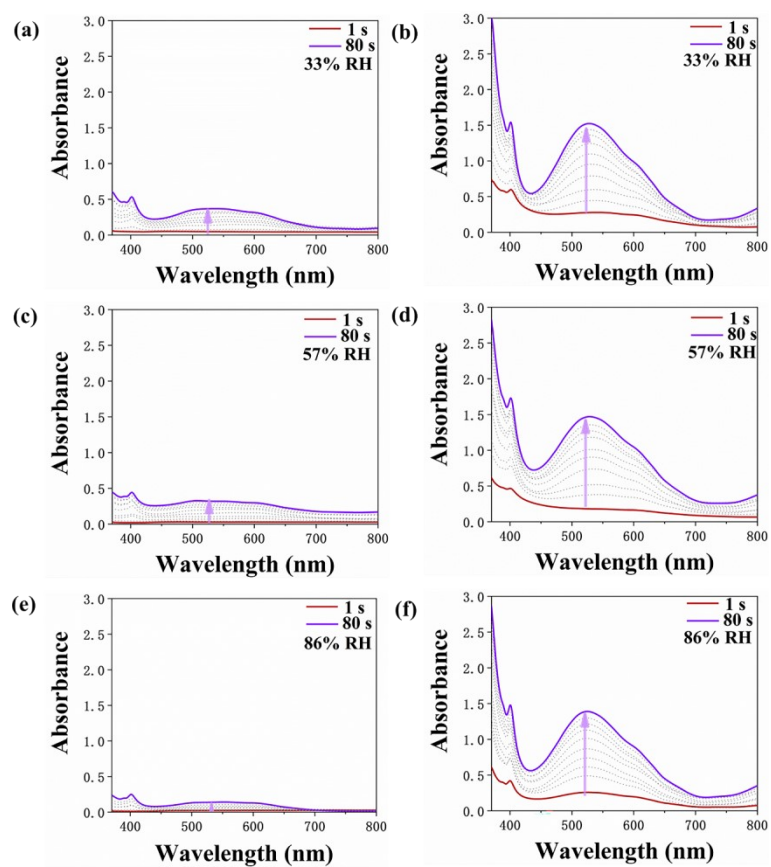

**Fig. S12** (a), (b) and (c) are UV-vis spectra of HCP/V<sub>2</sub><sup>2+</sup>/0 wt% ZnO at different RH environments. (d), (e) and (f) are UV-vis spectra of HCP / V<sub>2</sub><sup>2+</sup> / 5.5 wt% ZnO at different RH environments.

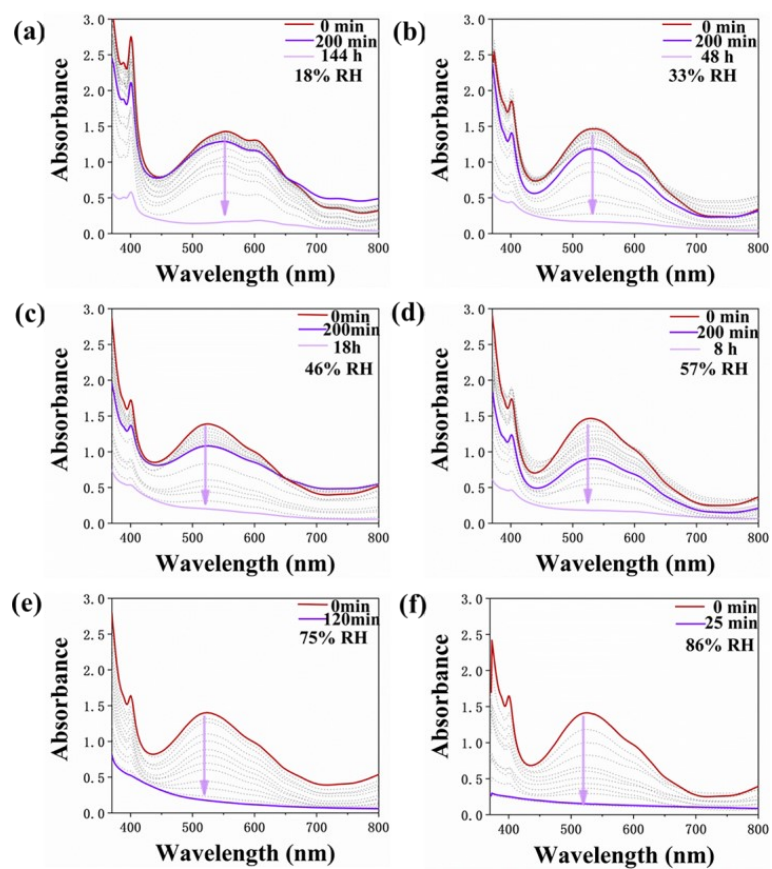

**Fig. S13** UV-vis spectra of HCP/V<sub>2</sub>O<sub>5</sub>/5.5 wt% ZnO film in the decoloration state at different RH environments.

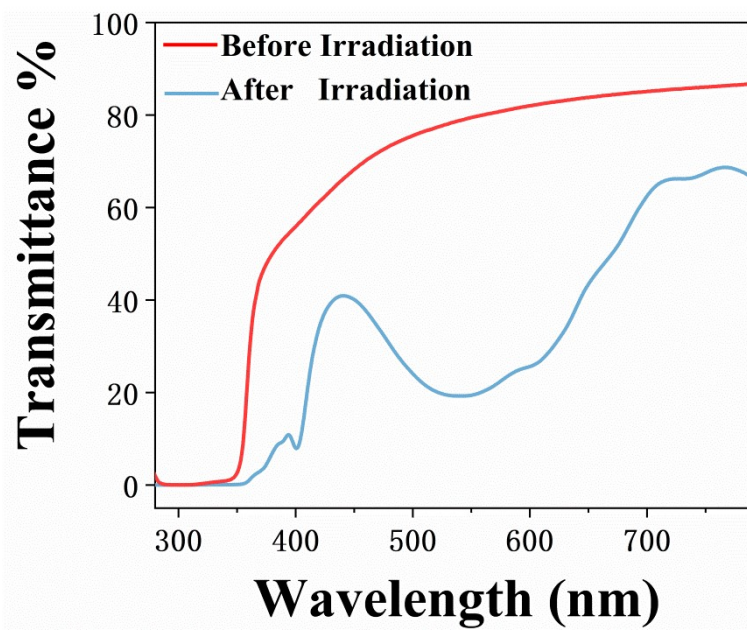

**Fig. S14** The transmittance curves of the HCP/V<sub>2</sub><sup>2+</sup>/5.5 wt% ZnO glass coating were recorded before and after exposure to outdoor environments with UV index of 9 for 20 seconds.

## References

1. Q. Shao, H. Lin and M. Shao, *ACS Omega*, 2020, **5**, 10297-10300.
2. F. J. Zhao, Q. Y. Li, K. L. Han and T. Q. Lian, *The Journal of Physical Chemistry C*, 2018, **122**, 17136-17142.
3. T. Zou, X. X. Xing, Y. Yang, Z. Z. Wang, Z. D. Wang, R. J. Zhao, X. Zhang and Y. D. Wang, *Journal of Alloys and Compounds*, 2020, **825**, 153904.
